# Supplementary material
Source: PubMed Central journal article supplement (PMC2922998)
Supplement: deq155_1.pdf [file deq155_1.pdf]

## **Johnson et al. 2010: Supplementary Material 1**

### **Table 1: Some of the main protagonists mentioned in the text**

(those marked \* are referenced in *Who's Who Online edition*. Oxford: OUP 2009)

#### ***Medical Research Council associated staff***

Professor (Sir, 1973) **John Archibald Browne Gray** MA MB BChir ScD FRS (1918-): MRC Secretary, 1968-1977\*.

Professor (Sir, 1982) **James Learmonth Gowans** MA DPhil MB BS CBE FRS (1924-): MRC Secretary, 1977 –1987; Secretary General, Human Frontier Science Programme, Strasbourg, 1989-93\*.

(**Samuel**) **Griff(ith) Owen** MB BS MD FRCP (1925-): MRC Second Secretary, 1968-1982\*.

**Malcolm PW Godfrey** MB BS FRCP CBE (1926-): MRC Principal Medical Officer 1970-74; Medical Officer, 1960-64; Senior Medical Officer, 1964-70; Dean, Royal Postgraduate Medical School, 1974-83; MRC Second Secretary, 1983-88\*.

**Sheila Mary Howarth** (Lady McMichael, 1965) MB BS FRCP (1920-2000): MRC staff, 1964-; Senior, then Principal Medical Officer, 1968-1980 (Owen, 2000).

**Duncan P Thomas** MD DPhil FRCPATH (1929-): MRC Medical Officer, 1970-1971; Senior Medical Officer, Committee on Safety of Medicines, 1970-1974; Head of the Division of Haematology at the National Institute for Biological Standards and Control, 1976-1991 (Thomas, 1978).

**Barbara Rashbass** MB BS DCH DPH FRCP: MRC Medical Officer, 1968-1975; Senior Medical Officer, 1975-1982; Principal Medical Officer, 1982-1987; Director, Wolfson Foundation, 1990-1997\*.

Prof (Sir, 1978) **Graham M Bull** (1918-1987): First Director of the MRC Clinical Research Centre, Northwick Park, 1966-1978 (Bull, 1988).

#### ***DHSS associated staff***

(Sir, 1971) **George Godber** BA BM DM MRCP FRCP DPH GCB CB (1908-2009): Chief Medical Officer, DHSS, 1960-1973\*.

(Sir, 1975) **Henry Yellowlees** MA, BM, BCh FRCP FFCM FRCS FRCPE CB (1919-2006): Chief Medical Officer, DHSS, 1973-1983\*.

Sir (Baron 1987) **Keith Sinjohn Joseph** Bt PC CH (1918-1994): Secretary of State for Social Services, DHSS, June 1970 - March 1974\*.

(Baron, 1983) **David Hedley Ennals** PC (1922-1995): Secretary of State for Social Services, April 8 1976 - May 4 1979\*.

(Sir, 1973) **Douglas Andrew Kilgour Black** BSc MB, ChB, MD, FRCP, FRCPGlas., FRCPath, FRCPE, FRCPsych., FRCGP, FRCOG (1913-2002): Chief Scientist at DHSS (1973-1977)\*.

**Richard HL Cohen** CB, MRCS (1907-1998): MRC staff, 1948-1963; seconded to the DHSS, as Principal Medical Officer 1962-67; Deputy Chief Medical Officer, 1967-72; Chief Scientist, 1972-73 (Wilson, 1998).

Professor (Sir, 1972) **John HF Brotherston** Mb ChB MD FRCPE FRCPGlas FRCP (1915-1985): Chief Medical Officer, Scottish Home and Health Department, 1964-1977; Hon Physician to the Queen, 1965-68; Professor of Community Medicine, Edinburgh, 1977-1980 (Forwell, 1985).

#### *Other key players*

Professor (Colin Russel) **Bunny Austin** BVSc DSc (1914–2005): Charles Darwin Professor of Animal Embryology and head of the Marshall Laboratory in the Cambridge Physiology Department, 1967-1981. Previously at MRC National Institute for Medical Research, 1947-48 and 1954-1960 (Austin, 1995).

Professor **David Tennent Baird** BA MB ChB DSc CBE FRCP FRCOG FRSE FMedSci (1935-): Lecturer in Obstetrics and Gynaecology, Edinburgh University 1968-1972; Dep. Dir, MRC Unit of Reproductive Biology, Edinburgh, 1972–77; Professor, Obstetrics and Gynaecology, Edinburgh University 1977-1985; MRC Research Professor of Reproductive Endocrinology, Edinburgh University, 1985–2000\*.

(Professor, 1979) **Barry Bavister** PhD (1943-): Research student with Bunny Austin 1967-1971; Professor, Department of Animal Health and Biomedical Sciences, University of Wisconsin, Madison, 1979-2000; Professor and Endowed Chair in Biology, University of New Orleans, 2000-2008.

Professor (Sir, 1986) **Walter Fred Bodmer** MA PhD FRCPath FRS FI Biol (1936-): Prof. of Genetics, University of Oxford, 1970–79. Principal, Hertford College, Oxford, 1996–2005\*.

**Michael Bright** MA MB BChir FRCS FRC OG (1935-): Appointed Consultant in Obstetrics & Gynaecology to the UCH and EARH Authority (Newmarket General Hospital) on 1 May 1974, with three sessions in Cambridge and six sessions in Newmarket.

**W Graham Cannon** MA (1925-): House Governor and Secretary of United Cambridge Hospitals, 1963-1973; Area NHS administrator for Cambridgeshire, 1973-1975; Director of the Kings Fund Centre, 1975-1981.

Professor **Cedric O Carter** MA DM FRCP (1971-1984): Director of the MRC Clinical Genetics Unit at the Institute of Child Health, London, 1964-1982 (Anon, 2009a).

**Theodore Moir Chalmers** MB ChB (Edin) FRCP MD (Cantab and Edinburgh) FRCPE (1919-1984): Dean of the Cambridge Clinical School, 1975-1979; Consultant Physician in Cambridge, 1962-1984; Dean of Clinical Research and Post Graduate Teaching, 1962-1979 (Chalmers, 1984).

Prof (Sir, 1974) **Stanley George Clayton** MD MS FRCP FRCS FRCOG FKC (1911-1986): Professor of Obstetrics and Gynaecology, Kings College Hospital, 1963-1976; President RCOG, 1973-1975\*.

Professor **Ian D Cooke** FMedSci: Senior Lecturer, University of Cardiff, 1968-1972; Professor of Obstetrics and Gynaecology, University of Sheffield, 1972-2000. (Anon, 2009b).

Professor (Robert Royston Amos) **Robin Coombs** BSc MRCVS PhD ScD FRCPATH FRS (1921-2006): Quick Professor in Immunology, University of Cambridge, 1966-88\*.

Prof **Geoffrey S Dawes** BA BSc BM BCh DM CBE FRCOG, FRCP FRS (1918-1978): Director, Nuffield Institute for Medical Research, Oxford, 1948-1985 (Hanson, 1996).

Professor **Anthony Clifford Dornhorst** CBE MB BS MD FRCP (1915-2003): Professor of Medicine, St George's Hospital Medical School, 1959-1980; Member of Medical Research Council in 1974 (Dornhurst, 2003).

Professor **Charles Primrose Douglas** FRCOG (1921-2005): Professor of Obstetrics and Gynaecology, University of Cambridge, 1976-1988\*.

Prof. **H John Evans** CBE BSc PhD FIBiol FRCP (Edin) FRCS (Edin) FRSE (1930-2007): Head of Genetics and Director of the MRC Clinical and Population Cytogenetics Unit, Edinburgh, 1969-1994 (Bird, 2007).

(Professor, 1978) (Sir, 2005) **Richard Lavenham Gardener** MA PhD FRS (1943-): graduate student with Robert Edwards, 1966-1970; Royal Society Henry Dale Research Professor, Department of Zoology, Oxford, 1978-2003\*.

Professor **Tony William Alphonse Glenister** MRCS LRCP MB BS PhD Dsc CBE (1923-1998): Professor of Anatomy, Charing Cross Hospital Medical School, 1970-84\*.

Professor **Geoffrey Wingfield Harris** MA MD ScD DM CBE FRS (1913-1971): Professor of Anatomy, University of Oxford, 1962-1971 (Vogt, 1972).

Professor **Peter J Heald** DSc FRSE (1925-1996); Professor of Biochemistry, University of Strathclyde, 1966-1978 (Fletcher, 1996).

Professor **Peter J Huntingford** (1929-2000): Professor of Obstetrics and Gynaecology, St Mary's Hospital, London, 1965-1970; WHO staff, 1970-1974 (Savage, 2000).

Professor Sir (1970) **Norman Jeffcoate** MB ChB MD FRCSED FRCOG (1907-1992); Professor of Obstetrics and Gynaecology, Liverpool, 1945-1972; President of the RCOG, 1969-1972 (Atlay, 1992).

(Sir, 1995) **John Royden Maddox** (1925-2009): Editor of *Nature*, 1966-1973 and 1980-1985\*.

(Dame, 1993) Dr **Anne Laura McLaren** DPhil FRCOG FMedSci FRS (1927-2007): Director, MRC Mammalian Development Unit, 1974-92 (Franklin, 2007).

Professor **Ivor Henry Mills** MB BChir MD MA FRCP (1921-2005): Professor of Investigative Medicine, University of Cambridge, 1963-1988 (Sissons and Cox, 2005).

Professor **Beatrice Mintz** (1921-): Member and now Jack Schultz Professor in Basic Science, Institute for Cancer Research, Fox Chase Centre, Philadelphia, 1960- (Mintz, 2009).

Prof Sir **Alan Sterling Parkes** CBE FRS (1900-1990): National Institute for Medical Research, 1932-1961; Mary Marshall and Arthur Walton Professor of the Physiology of Reproduction, University of Cambridge, 1961-1967 (Polge, 2006).

Professor (Sir, 1985) **William Stanley Peart** MD FRS (1922-): Professor of Medicine, St Mary's Hospital Medical School, 1956-87\*.

**Jean Marion Purdy** SRN (1945-1985): nurse assistant to Edwards and then also Steptoe, 1968-1985.

**Ralph Robinson** MB BS LRCP, FRCS FRCOG (1936-): Consultant Obstetrician and Gynaecologist, Addenbrooke's Hospital, 1969-1998).

Dr (Prof, 1982) **Roger Valentine Short** BVSc MRCVS MSc PhD ScD FMedSci FRCOG FRS FRSE FRCVS (1930-): Member, ARC Unit of Reproductive Physiology and Biochemistry, Cambridge, 1956-72; Director, MRC Unit of Reproductive Biology, Edinburgh, 1972-82\*.

Professor (Sir, 1988) **Alec Cuthbert Turnbull** MB ChB MD FRCOG CBE (1925-1990): Professor of Obstetrics and Gynaecology, Welsh National School of Medicine, Cardiff, 1966-1973 and Oxford, 1973-1990; member SCOG, CRB, AG (Turnbull, 1990).

Professor **Conrad Hal Waddington** MA DSc CBE FRS (1905-1975): Professor of Animal Genetics, University of Edinburgh, 1947-1968 (Robertson, 1977; Slack, 2002)

Professor **James Dewey Watson** BS PhD Hon KBE (1928-): Professor of Molecular Biology, Harvard University, 1961-1976; Director, Cold Spring Harbor Laboratory, 1968-1994.

### References

- Anon. Carter C. Cedric Carter – CGS Founder at [http://www.clingensoc.org/people/cedric\\_carter.htm](http://www.clingensoc.org/people/cedric_carter.htm) 2009a.
- Anon. [www.lowcost-ivf.org/.../Biography%20of%20Emeritus%20Professor%20Ian%20Cooke](http://www.lowcost-ivf.org/.../Biography%20of%20Emeritus%20Professor%20Ian%20Cooke) 2009b.
- Atlay RD. Obituary: Sir Norman Jeffcoate. *BMJ* 1992;**305**:1429.
- Austin CR. Biography of Colin Russel Austin, recipient of the 1995 Embryo Transfer Pioneer Award. *Theriogenology* 1995;**43**:1-2.
- Bird C. (Henry) John Evans. 2007;[www.rse.org.uk/fellowship/obits/obits\\_alpha/evans\\_j](http://www.rse.org.uk/fellowship/obits/obits_alpha/evans_j)
- Bull GM. Obituary: Graham MacGregor Bull. *S A M J* 1988;**73**:628.
- Chalmers TM. Obituary. *Munk's Roll*, 1984;**VIII**:80.  
[http://www.rcplondon.ac.uk/heritage/munksroll/munk\\_details.asp?ID=5252](http://www.rcplondon.ac.uk/heritage/munksroll/munk_details.asp?ID=5252)
- Dornhorst AC. Obituary. *Munk's Roll*, 2003;**XI**:163.
- Fletcher WW. Obituary Peter Joseph Heald 1996 at [www.rse.org.uk/fellowship/obits/obits\\_alpha/heald\\_peter.pdf](http://www.rse.org.uk/fellowship/obits/obits_alpha/heald_peter.pdf)
- Forwell G. Obituary: Leadership remembered: Sir John Brotherston. *Commun Med* 1985;**7**:155-6.
- Franklin S. Obituary Dame Anne McLaren. *Regen Med* 2007;**2**:853-9.
- Hanson MA. Tribute to Professor Geoffrey Dawes. *Ped Res* 1996;**40**:774-5.
- Mintz B. 2009;<http://www.answers.com/topic/beatrice-mintz> & <http://www.bookrags.com/biography/beatrice-mintz/>
- Owen SG. Obituary Howarth, Sheila Mary. *Munk's Roll*, 2000;**XI**:276.  
[http://www.rcplondon.ac.uk/heritage/munksroll/munk\\_details.asp?ID=4995](http://www.rcplondon.ac.uk/heritage/munksroll/munk_details.asp?ID=4995)
- Polge C. Sir Alan Sterling Parkes. *Biogr Mem Fell R Soc* 2006;**52**:263-83.
- Robertson A. Conrad Hal Waddington. 8 November 1905 - 26 September 1975. *Biogr Mem Fell R Soc* 1977;**23**:575-622.
- Savage W. Obituary Peter Huntingford. *Guardian* 2000;**30 Oct**.
- Sissons P, Cox T. Obituary Mills, Ivor Henry. *Munk's Roll*, 2005;**XII**:  
<http://munksroll.rcplondon.ac.uk/Biography/Details/5514>.
- Slack JMW. Timeline: Conrad Hal Waddington: the last Renaissance biologist? *Nature Rev Genet*, 2002;**3**:889-95.
- Thomas DP. Dr Duncan Thomas. *Br. Med. Bull.* 1978;**34**:210.
- Turnbull A. Obituary Sir Alexander Turnbull CBE, MD, FRCOG. *BMJ* 1990;**301**:549.
- Vogt M. Harris, Geoffrey Wingfield. *Biog Mem Royal Soc* 1972;**18**:309-29.
- Wilson JMG. Richard Cohen: first Chief Scientist at the DHSS. *J R Soc Med* 1998;**91**:222-4.
