# Supplementary material
Source: PubMed Central journal article supplement (PMC2922998)
Supplement: deq155_2.pdf [file deq155_2.pdf]

## Johnson et al. 2010: Supplementary Material 2

### **Table 2: Membership of committees and working groups**

#### *Table 2A. Sub-Committee on Obstetrics and Gynaecology (SCOG)*

[Names are followed by institution and main research interests between 1965 and 1975 ascertained from PubMed record].

*Members:* **Prof WS Peart** (Chair, St Mary's, Medicine, renal physiology and endocrinology), Drs **DT Baird** (Edinburgh, Obstetrics and Gynaecology, endocrinology of female cycle), **RV Brooks** (St Thomas's, Chemical Pathology, steroid physiology), **GS Dawes** (Oxford, Institute for Medical Research, fetal and neonatal physiology), **FE Hytten** (Newcastle, MRC Unit, physiology of pregnancy) and **RV Short** (Cambridge, Veterinary School, reproductive physiology and endocrinology), and Profs **I Donald** (Glasgow, Midwifery, physiology of pregnancy), **MC MacNaughton** (Glasgow, Obstetrics and Gynaecology, endocrinology and physiology of pregnancy), **JPM Tizard** (Hammersmith, Paediatrics, perinatal physiology) and **AC Turnbull** (Cardiff, Obstetrics and Gynaecology, physiology of late pregnancy and parturition).

*Associated MRC staff:* **Grieve, Owen, Duncan, Godfrey and Howarth**

*Later co-opted* to undertake site visits with **Prof Peart** to the five short-listed clinical schools (Cardiff, Edinburgh, Liverpool, Oxford and Glasgow) – Profs **RV Brooks** (St Thomas's, reproductive endocrinology), **FE Hytten** (Newcastle, pre and post-natal nutrition), **JC McClure Browne** (Hammersmith, Obstetrics and Gynaecology) and **TE Oppe** (St Mary's, Paediatric Medicine).

SOCOG met on 1 July 1970, 13 October 1970, 27 January 1971, and, by circulation, from late August to 6 September 1971. It reported to Council in October 1971, which (i) authorized the office to follow up the suggestions on training awards and career posts; (ii) referred an application from Professor **Turnbull** (Cardiff) for long-term support to the Clinical Research Board, commending to them the principle of using a programme grant to Cardiff to create opportunities for basic science researchers to apply their knowledge

in the clinical field; (iii) agreed in principle to the establishment of a unit in reproductive biology under the direction of Dr **RV Short** in the Medical School of the University of Edinburgh, with Dr **DT Baird** as Deputy Director to provide the clinical link; (iv) to disband the subcommittee with thanks to the members and chairman (MRC Minute NA FD71/980).

***Table 2B. MRC Clinical Research Board***

The CRB met to decide on Edwards' and Steptoe's application on 1 April 1971.

**Members:** Sir **Brian Windeyer** (chair). Profs **AC Turnbull** (morning only; also referee and on SCOG), **CM Anderson**, **TP Whitehead**, **AW Kay**, **AC Dornhorst** (ex officio), **WS Peart** (also on SCOG), **JG Robson** (ex officio), **DA Pond**, **Dr T Symington**

**Assessors (DHSS):** Dr **JHF Brotherston** and Sir **George Godber**

**MRC Staff:** **JAB Gray** (Secretary), **SG Owen** (Second secretary), **BS Lush**, **MFW Godfrey**, and Miss **Daphne Gloag** (Secretariat). Other members of HQ staff were in attendance for particular items but are not named.

**Apologies:** Profs **RY Calne**, **WRS Doll**, **OL Wade** and Dr **FD Beddard**

***Table 2C. MRC Advisory Group to Review Policy on Research Related to in-Vitro Fertilisation and Embryo Transfer in Humans***

The Group reported in June 1979, July 1982 and November 1984 (MRC NA FD84/S111).

**Members:** Dr **SG Owen** (chair), Profs **GS Dawes**, **CA Finn**, **MC MacNaughton**, **PE Polani**, **AC Turnbull**, The Rt Rev **JS Habgood** and Dr **RF Mahler**. Added for second meeting: Profs **HJ Evans**, **JP Hearn**, **R Williamson** and Drs **A McLaren**, and **JDO Loudon** (from RCOG).
